# Supplementary material for: Solar light driven atomic and electronic transformations in a plasmonic Ni@NiO/NiCO3 photocatalyst revealed by ambient pressure X-ray photoelectron spectroscopy
Source: Royal Society of Chemistry journal article supplement (doi:10.1039/d4cy00204k), 2024-01-01
Supplement: d4cy00204k1.pdf [file d4cy00204k1.pdf]

## Supporting Information

### Solar Light Driven Atomic and Electronic Transformations in Plasmonic Ni@NiO/NiCO<sub>3</sub> Photocatalyst revealed by Ambient Pressure X-ray Photoelectron Spectroscopy

Manoj Kumar Ghosal<sup>1\*</sup>, Parisa Talebi<sup>1</sup>, Harishchandra Singh<sup>1\*</sup>, Alexander Klyushin<sup>2</sup>, Esko Kokkonen<sup>2</sup>, Mohammed Alaoui Mansouri<sup>1</sup>, Marko Huttula<sup>1</sup>, Wei Cao<sup>1</sup> and Samuli Urpelainen<sup>1\*</sup>

1. Nano and Molecular Systems Research Unit, University of Oulu, FIN-90014, Finland.

2. MAX IV Laboratory, Lund University, Box 118, Lund, 22100, Sweden

\*Corresponding authors: [manoj.ghosal@oulu.fi](mailto:manoj.ghosal@oulu.fi) (MG), [harishchandra.singh@oulu.fi](mailto:harishchandra.singh@oulu.fi) (HS), and [samuli.urpelainen@oulu.fi](mailto:samuli.urpelainen@oulu.fi) (SU)

#### Table of contents:

|                                                                                                    |   |
|----------------------------------------------------------------------------------------------------|---|
| Figure S1: Ni 2p spectra recorded under UHV conditions with light illumination and dark conditions | 2 |
| Figure S2: The second cycle Ni 2p spectrum under dark and light illumination conditions            | 2 |
| Figure S3: PCA analysis of C 1s spectra                                                            | 3 |
| Figure S4: PCA analysis of O 1s spectra                                                            | 3 |
| Table S1: Fitting Parameter for Ni 2p                                                              | 4 |
| Table S2: Fitting Parameter for C 1s                                                               | 5 |
| Table S3: Fitting Parameter for O 1s                                                               | 6 |

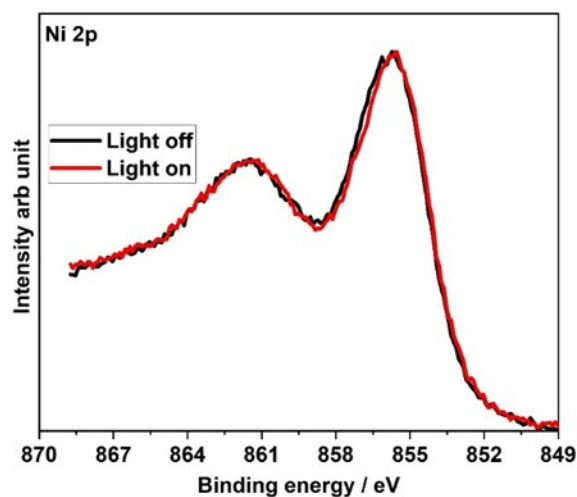

Figure S1: (a) Ni 2p spectra recorded under UHV conditions with light illumination and dark conditions. Spectra of Ni 2p are not significantly affected by light illumination.

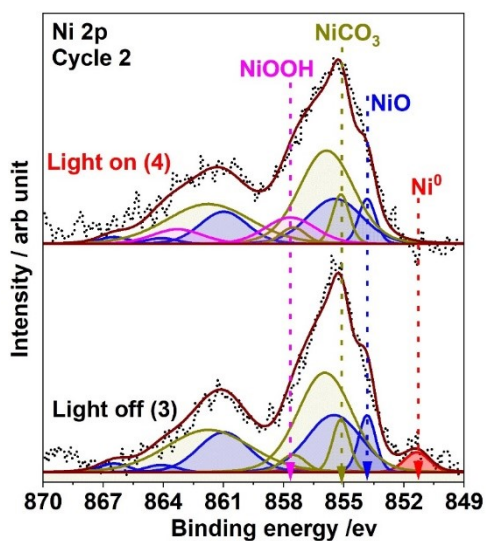

Figure S2:- The second cycle Ni 2p spectrum under dark and light illumination conditions with 1 mbar H<sub>2</sub>O is shown in Figure 3. In the main paper, we present the spectra for the first cycle. As can be seen from these spectra, the second cycle is like the first cycle, indicating that Ni 2p is reproducible.

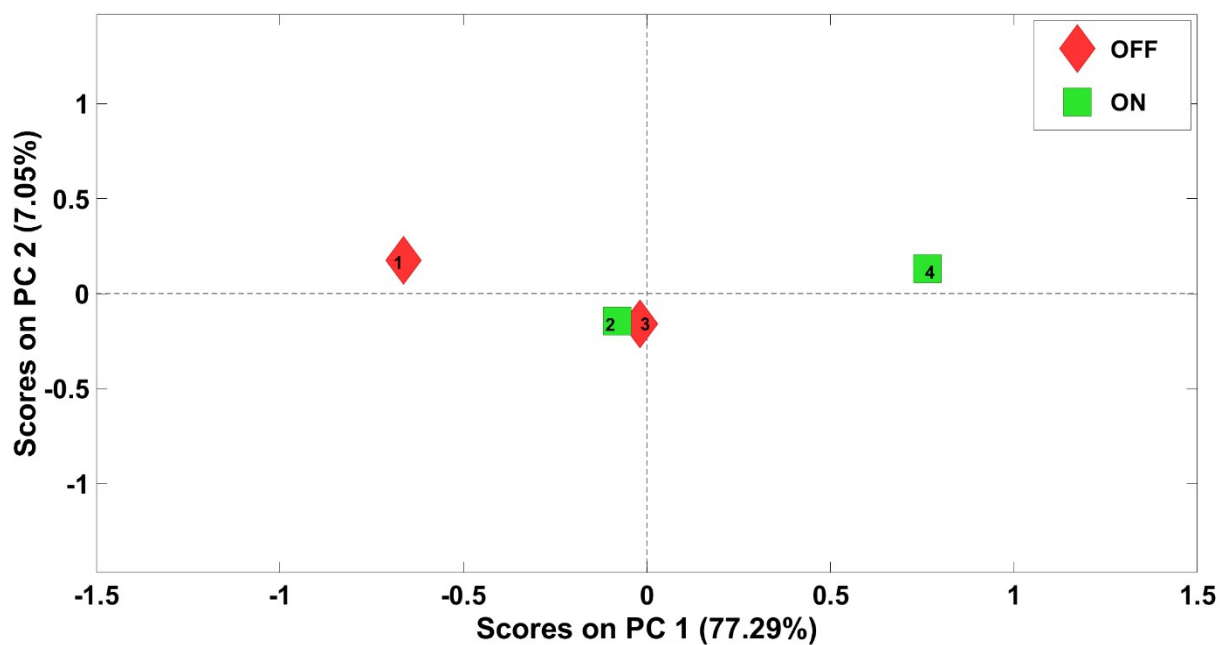

Figure S3: Score plot of the two first PCs on the PCA model of C 1s spectra: red spectra 1 and 3 (light OFF), green samples 2 and 4 (light ON)

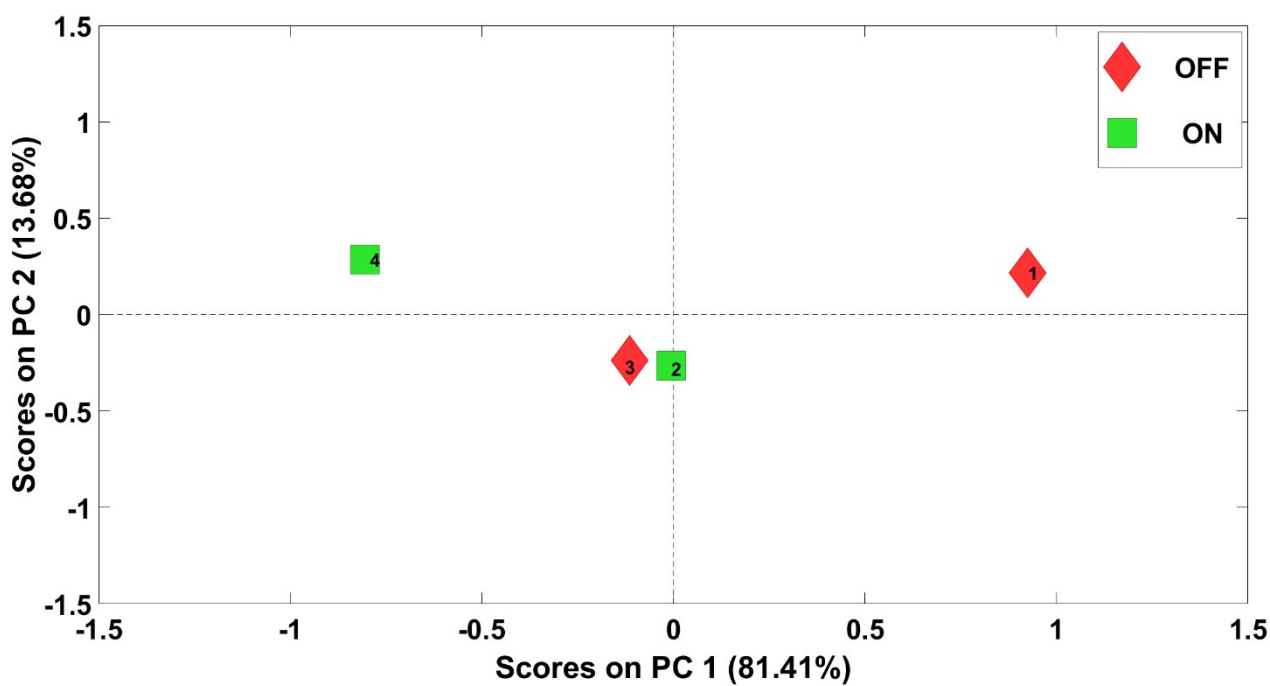

Figure S4: Score plot of the two first PCs on the PCA model of O 1s spectra: red spectra 1 and 3 (light OFF), green samples 2 and 4 (light ON)

Table S1. \_ Fitting Parameter for Ni 2p, of Ni@NiO/NiCO<sub>3</sub>

| Peak no                                          | Ni <sup>0</sup> |        |        | NiO    |        |        |        |        | NiCO <sub>3</sub> |        |        |        |        | Ni(OOH) |       |
|--------------------------------------------------|-----------------|--------|--------|--------|--------|--------|--------|--------|-------------------|--------|--------|--------|--------|---------|-------|
|                                                  | 1               | 2      | 3      | 1      | 2      | 3      | 4      | 5      | 1                 | 2      | 3      | 4      | 5      | 1       | 2     |
| Position (eV, UHV)                               | 852.1           | 855.77 | 860.12 | 854.12 | 855.62 | 861.06 | 864.62 | 866.75 | 855.20            | 856.2  | 858.20 | 860.50 | 862.0  |         |       |
| Position (eV, 1 mbar H <sub>2</sub> O Light OFF) | 851.8           | 855.55 | 860.2  | 853.9  | 855.52 | 861.02 | 864.52 | 866.65 | 854.8             | 856.03 | 858.0  | 860.26 | 861.66 |         |       |
| Position (eV, 1 mbar Light H <sub>2</sub> O ON)  |                 |        |        | 853.9  | 855.51 | 860.91 | 864.51 | 866.64 | 854.8             | 856.09 | 858.02 | 860.23 | 861.72 | 857.4   | 864.5 |
| FWHM (eV, UHV)                                   | 1.5             | 2.3    | 2.2    | 1.2    | 3.2    | 4.2    | 1.9    | 2.55   | 1.26              | 2.36   | 1.35   | 2.15   | 5.2    |         |       |
| FWHM (eV, 1 mbar H <sub>2</sub> O Light OFF)     | 1.5             | 2.3    | 1.2    | 1.2    | 3.2    | 4.2    | 1.9    | 2.55   | 1.25              | 2.36   | 1.36   | 2.15   | 5.2    |         |       |
| FWHM (eV, 1 mbar H <sub>2</sub> O Light ON)      |                 |        |        | 1.2    | 3.2    | 4.2    | 1.9    | 2.55   | 1.25              | 2.3    | 1.36   | 2.15   | 5.2    | 3.1     | 2.79  |

Table S2. Fitting Parameter for C 1s of Ni@NiO/NiCO<sub>3</sub>

|                                                       | <b>NiO</b> | <b>NiCO<sub>3</sub></b> | <b>-COOH</b> | <b>-C-OH</b> |
|-------------------------------------------------------|------------|-------------------------|--------------|--------------|
| <b>Position (eV, UHV)</b>                             | 285        | 288.4                   |              |              |
| <b>Position (eV, 1 mbar H<sub>2</sub>O Light OFF)</b> | 285        | 288                     | 289.7        | 286.7        |
| <b>Position (eV, 1 mbar H<sub>2</sub>O Light ON)</b>  | 285        | 288                     | 289.7        | 286.7        |
| <b>FWHM (eV, UHV)</b>                                 | 2.4        | 3.5                     |              |              |
| <b>FWHM (eV, 1 mbar H<sub>2</sub>O Light OFF)</b>     | 2.2        | 3.5                     |              |              |
| <b>FWHM (eV, 1 mbar H<sub>2</sub>O light ON)</b>      | 2.2        | 3.5                     | 3.3          | 2.3          |

Table S3. Fitting Parameter for O 1s of Ni@NiO/NiCO<sub>3</sub>

|                                                       | NiO   | NiCO <sub>3</sub> | -COOH | NiOOH | -C-OH | Ads. H <sub>2</sub> O | Gas phase peak |      |       |       |
|-------------------------------------------------------|-------|-------------------|-------|-------|-------|-----------------------|----------------|------|-------|-------|
|                                                       |       |                   |       |       |       |                       | 1              | 2    | 3     | 3     |
| <b>Position (eV, UHV)</b>                             | 530.2 | 531.5             |       |       |       |                       |                |      |       |       |
| <b>Position (eV, 1 mbar H<sub>2</sub>O Light OFF)</b> | 530.2 | 531.4             |       |       |       | 533                   | 534.4          | 535  |       |       |
| <b>Position (eV, 1 mbar H<sub>2</sub>O Light ON)</b>  | 530.2 | 531.4             | 533.2 | 531.0 | 531.7 | 533                   | 534.4          | 535  | 534.8 | 535.4 |
| <b>FWHM (eV, UHV)</b>                                 | 2.1   | 2.4               |       |       |       |                       |                |      |       |       |
| <b>FWHM (eV, 1 mbar H<sub>2</sub>O Light ON)</b>      | 1.9   | 2.1               |       |       |       | 2                     | 0.83           |      |       |       |
| <b>FWHM (eV, 1 mbar H<sub>2</sub>O light ON)</b>      | 1.9   | 2.2               | 1.95  |       | 2.1   | 2                     | 0.75           | 0.85 |       | 0.1   |
